# Supplementary material for: Incorporation of Photoperiod Insensitivity and High-Yield Genes into an Indigenous Rice Variety from Myanmar, Paw San Hmwe
Source: MDPI journal article supplement (doi:10.3390/agronomy14030632), 2024-03-20
Supplement: s1 [file s1]

Archive with 1 entries (1 files):
- agronomy-2893041-supplementary.pdf
